# Supplementary material
Source: HighWire-hosted journal article supplement (https://spcare.bmj.com/content/spcare-2022-004034)
Supplement: inline-supplementary-material-1 [file inline-supplementary-material-1.pdf]

| <b>Supplementary Table 1. Demographics of studies included in the review</b> |             |                |                     |                                           |                    |                 |                                          |                           |                                                                                                           |                             |                                                                                                                             |
|------------------------------------------------------------------------------|-------------|----------------|---------------------|-------------------------------------------|--------------------|-----------------|------------------------------------------|---------------------------|-----------------------------------------------------------------------------------------------------------|-----------------------------|-----------------------------------------------------------------------------------------------------------------------------|
| <b>Authors</b>                                                               | <b>Year</b> | <b>Country</b> | <b>Study design</b> | <b>Participant focus</b>                  | <b>Sample size</b> | <b>% female</b> | <b>Mean Age</b>                          | <b>Ethnicity and race</b> | <b>Follow up period</b>                                                                                   | <b>Recruitment rate (%)</b> | <b>Retention rate (%)</b>                                                                                                   |
| Badger et al., [48]                                                          | 2011        | USA            | RCT                 | Spousal partners and other family members | 70                 | 93              | 61                                       | White (81%)               | 8 weeks<br>16 weeks                                                                                       | 39                          | T1 <sup>a</sup> 100%,<br>8 weeks: 93%<br>16 weeks: 90%                                                                      |
| Borji et al., [31]                                                           | 2017        | Iran           | RCT                 | Spousal partners and other family members | 80                 | 40              | IG <sup>b</sup> 39<br>CG <sup>c</sup> 40 | NR <sup>d</sup>           | 4 weeks<br>8 weeks                                                                                        | NR                          | NR                                                                                                                          |
| Campbell et al., [49]                                                        | 2007        | USA            | RCT                 | Spousal partners                          | 40                 | 100             | 59                                       | NR                        | 6 weeks                                                                                                   | 18                          | 6 weeks: 75%                                                                                                                |
| Chambers et al., [27, 28]                                                    | 2015; 2019  | Australia      | RCT                 | Spousal partners                          | 189                | 100             | 60                                       | NR                        | 3 months<br>6 months<br>12 months<br>2 years<br>3 years<br>4 years<br>5 years                             | 47                          | 3 months: 85%<br>6 months: 84%<br>12 months: 84%<br>2 years: 82%<br>3 years: 89%<br>4 years: 82%<br>5 years: 81%            |
| Chien et al., [40]                                                           | 2020        | Taiwan         | RCT                 | Spousal partners                          | 103                | Not reported    | 64                                       | NR                        | 6 weeks (T1)<br>10 weeks (T2 <sup>e</sup> )<br>18 weeks (T3 <sup>f</sup> )<br>24 weeks (T4 <sup>g</sup> ) | 20                          | Control 100%<br>IG1 92%<br>IG2 100%<br><br>10 weeks:<br>Control 100%<br>IG1 92%<br>IG2 100%<br><br>18 weeks:<br>Control 98% |

|                       |      |           |     |                  |     |              |                |                                                                                               |                                                  |    |                                                                            |
|-----------------------|------|-----------|-----|------------------|-----|--------------|----------------|-----------------------------------------------------------------------------------------------|--------------------------------------------------|----|----------------------------------------------------------------------------|
|                       |      |           |     |                  |     |              |                |                                                                                               |                                                  |    | IG1 88%<br>CG2 100%<br><br>24 weeks:<br>Control 98%<br>IG1 88%<br>IG2 100% |
| Couper et al., [33]   | 2015 | Australia | RCT | Spousal partners | 62  | 100          | IG 60<br>CG 62 | NR                                                                                            | 10 weeks (T1)<br>9 months (T2)                   | 30 | 9 months: 87%                                                              |
| Karlsen et al., [41]  | 2021 | Denmark   | RCT | Spousal partner  | 35  | 100          | 60             | NR                                                                                            | 2 months (T1)<br>8 months (T2)<br>12 months (T3) | 52 | 8 months: 85%<br>12 months: 80%                                            |
| Lyons et al., [34]    | 2016 | USA       | RCT | Spousal partners | 64  | 100          | 68             | • White (92%)                                                                                 | 3 months<br>6 months                             | 22 | 3 months: 100%<br>6 months: 100%                                           |
| Malcarne et al., [39] | 2019 | USA       | RCT | Spousal partners | 164 | Not reported | 62             | • White (82%)<br>• African-American (5.5%)<br>• Latino (5.5%)<br>• Asian (5%)<br>• Other (2%) | 2-3 months (T2)<br>6 months (T3)                 | 98 | Intervention group only<br>2 months: 82%<br>6 months: 84%                  |
| Manne et al., [35]    | 2004 | USA       | RCT | Spousal partners | 68  | 100          | 60             | • White (84%)<br>• African-American (12.5%)<br>• Hispanic (1.8%)<br>• Other (1.8%)            | 10 weeks (T1)                                    | 56 | Intervention group only<br>Post intervention: 88%                          |

|                            |      |        |     |                  |     |              |                |                                                                                                   |                                                                                                             |                                                                            |                                                                                                 |
|----------------------------|------|--------|-----|------------------|-----|--------------|----------------|---------------------------------------------------------------------------------------------------|-------------------------------------------------------------------------------------------------------------|----------------------------------------------------------------------------|-------------------------------------------------------------------------------------------------|
| Manne et al., [43]         | 2019 | USA    | RCT | Spousal partners | 237 | 99           | 57             | <ul style="list-style-type: none"> <li>• Non hispanic (97%)</li> <li>• White (74%)</li> </ul>     | 5 weeks<br>3 months<br>6 months.                                                                            | 15                                                                         | NR                                                                                              |
| McCaughan et al., [44]     | 2018 | UK     | RCT | Spousal partners | 17  | 100          | IG 64<br>CG 60 | <ul style="list-style-type: none"> <li>• Caucasian (100%)</li> </ul>                              | Baseline (T1),<br>Immediately post<br>intervention (T2),<br>1 month follow-<br>up post<br>intervention (T3) | 20                                                                         | Post-intervention<br>(T2):<br>IG 92.3%<br>CG 87.5%<br><br>1 month (T3):<br>IG 84.6%<br>CG 62.6% |
| Northouse et al., [45]     | 2007 | USA    | RCT | Spousal partners | 263 | Not reported | 59             | <ul style="list-style-type: none"> <li>• Caucasian (84%)</li> </ul>                               | Baseline<br>4 month<br>8 months<br>12 months                                                                | 69                                                                         | 4 months: 90%<br><br>(83%) completed<br>all 3 follow-up<br>assessments.                         |
| Walker et al., [46]        | 2013 | Canada | RCT | Spousal partners | 27  | 100          | NR             | NR                                                                                                | Baseline<br>6 months                                                                                        | 30.3% at one<br>site, no<br>figures<br>reported for<br>the second<br>site. | NR                                                                                              |
| Winters-Stone et al., [37] | 2016 | USA    | RCT | Spousal partners | 64  | 100          | IG 67<br>CG 70 | <ul style="list-style-type: none"> <li>• Non-Hispanic (94%)</li> <li>• Caucasian (94%)</li> </ul> | Baseline, 3mths<br>(T2), 6mths (T3)                                                                         | 22                                                                         | Baseline (T1)<br>IG: 100%<br>CG: 100%<br><br>3 months<br>IG: 100%<br>CG: 91%<br><br>6 months    |

|                       |      |           |           |                  |     |                |                                       |                                                                                                                                             |                                                                               |         |                                                                                                |
|-----------------------|------|-----------|-----------|------------------|-----|----------------|---------------------------------------|---------------------------------------------------------------------------------------------------------------------------------------------|-------------------------------------------------------------------------------|---------|------------------------------------------------------------------------------------------------|
|                       |      |           |           |                  |     |                |                                       |                                                                                                                                             |                                                                               |         | IG: 100%<br>CG: 84%                                                                            |
| Wittman et al., [51]  | 2022 | USA       | RCT       | Spousal partners | 142 | IG 95<br>CG 96 | IG 60<br>CG 59                        | <ul style="list-style-type: none"> <li>• IG 85% white</li> <li>• CG 74% white</li> <li>• 11% African American across both groups</li> </ul> | 3 and 6 months after treatment                                                | 44      | 3 months: 70%<br>6 months: 71%                                                                 |
| Canada et al., [32]   | 2005 | USA       | Pilot     | Spousal partners | 51  | 100            | Man alone group 61<br>Couple group 62 | <ul style="list-style-type: none"> <li>• White (88%)</li> <li>• Hispanic (8%)</li> <li>• African-American (4%)</li> </ul>                   | 3 months<br>6 months                                                          | NR      | Post treatment 82%<br>3 months 75%<br>6 months: 73%                                            |
| Carlson et al., [52]  | 2017 | Canada    | Pilot     | Spousal partners | 77  | 100            | 62                                    | NR                                                                                                                                          | Post-intervention<br>3 months post-intervention<br>6 months post-intervention | 11      | Post-intervention IG:84% CG:78%<br><br>3 months IG:71%, CG:75%<br><br>6 months IG: 80%, CG:75% |
| Hampton et al., [30]  | 2013 | Canada    | Pilot     | Spousal partners | 38  | 100            | IG 58<br>CG 60                        | • White (93%)                                                                                                                               | 2 months                                                                      | Unknown | 76%                                                                                            |
| Karlsen et al., [42]  | 2017 | Denmark   | Pilot     | Spousal partners | 7   | 100            | not recorded                          | NR                                                                                                                                          | 8 months<br>12 months                                                         | 14      | 71%                                                                                            |
| Levesque et al., [47] | 2015 | Australia | RCT,Pilot | Spousal partners | 42  | NR             | 60                                    | NR                                                                                                                                          | 2 months                                                                      | 23      | 95%                                                                                            |

|                        |      |                |           |                  |    |     |                |                                |                                                                                         |    |                    |
|------------------------|------|----------------|-----------|------------------|----|-----|----------------|--------------------------------|-----------------------------------------------------------------------------------------|----|--------------------|
| Manne et al., [36]     | 2011 | USA            | RCT,Pilot | Spousal partners | 71 | 97  | 56             | • White (83%)                  | Baseline<br>2 months                                                                    | 21 | IG: 95%<br>CG: 81% |
| Robertson et al., [38] | 2016 | United Kingdom | RCT,Pilot | Spousal partners | 42 | 98  | 64             | • White (100%)                 | Baseline<br>4 months after baseline (T1)<br>6 months after the end of intervention (T2) | 38 | 74%                |
| Song et al., [50]      | 2021 | USA            | RCT,Pilot | Spousal partners | 62 | 100 | IG 62<br>CG 62 | • White (71%)<br>• Black (24%) | 4-6 months<br>Semi structured post exit interview after T2                              | 42 | IG: 90%<br>CG: 81% |

| <b>Supplementary Table 2. Impact of interventions on carers' outcomes</b> |                                                                                                                                                                                                                                                               |                                                                                                                                                                                                                                                                                                                                                                                            |                              |                                                                           |                                                                                                                                                                                                                                       |
|---------------------------------------------------------------------------|---------------------------------------------------------------------------------------------------------------------------------------------------------------------------------------------------------------------------------------------------------------|--------------------------------------------------------------------------------------------------------------------------------------------------------------------------------------------------------------------------------------------------------------------------------------------------------------------------------------------------------------------------------------------|------------------------------|---------------------------------------------------------------------------|---------------------------------------------------------------------------------------------------------------------------------------------------------------------------------------------------------------------------------------|
| <b>Authors</b>                                                            | <b>Primary Outcomes</b>                                                                                                                                                                                                                                       | <b>Intervention description</b>                                                                                                                                                                                                                                                                                                                                                            | <b>Intervention modality</b> | <b>Intervention format</b>                                                | <b>Impact of intervention on carers outcomes</b>                                                                                                                                                                                      |
| Badger et al., 2011 [48]                                                  | <ul style="list-style-type: none"> <li>• Depression</li> <li>• Positive affect</li> <li>• Negative affect</li> <li>• Perceived stress</li> <li>• Fatigue</li> <li>• Social wellbeing</li> <li>• Social support from family</li> <li>• Spirituality</li> </ul> | IG1 <sup>a</sup> - Telephone interpersonal counselling (TIP-C <sup>e</sup> ). Carers received four phone calls to address problem related to physical and emotional wellbeing.<br>IG2 <sup>b</sup> Health education attention condition (HEAC <sup>f</sup> ) participants received National Cancer Institute prostate information booklets. Carers received 4 calls to review information. | Telephone                    | 8 week course                                                             | IG1 group had improved depression symptoms over time (p<0.05). IG2 had significantly improved depression (p<0.05), fatigue (p<0.01), social wellbeing (p<0.01), social support from family (p<0.05) and spiritual wellbeing (p<0.01). |
| Borji et al., 2017 [31]                                                   | <ul style="list-style-type: none"> <li>• Depression</li> <li>• Anxiety</li> <li>• Stress</li> </ul>                                                                                                                                                           | 1.5 hour twice weekly sessions x8 (followed by two summary session) based on cognitive behaviour therapy for managing stress.                                                                                                                                                                                                                                                              | Face-to-face                 | 5 (4 weeks of twice weekly sessions, then two further session of summary) | Significant decrease in depression and anxiety symptoms between groups at 4 and 8 weeks (both p=0.001)                                                                                                                                |
| Campbell et al., 2007 [49]                                                | <ul style="list-style-type: none"> <li>• Self efficacy</li> <li>• Quality of life</li> <li>• Caregiver strain</li> </ul>                                                                                                                                      | 1 hour sessions 6 Coping skills training - included information about prostate cancer and side effects, teaching problem solving skills and teaching cognitive coping skills                                                                                                                                                                                                               | Telephone                    | 6 week course                                                             | No significant effects for caregiver negative mood, strain or self efficacy. Moderate effect size for depression (0.46), fatigue (0.39), vigour (0.40), small effect size for strain (0.27) and self efficacy (0.30) between groups.  |

|                                      |                                                                                                                                                                                                                                                                                                                         |                                                                                                                                                                                                                                                                                                                                                                                                                                               |                                                  |                                                                         |                                                                                                                                                                                                                                                                                                                                                                                                                                                                                                                                                                                                                                                                                                                                                   |
|--------------------------------------|-------------------------------------------------------------------------------------------------------------------------------------------------------------------------------------------------------------------------------------------------------------------------------------------------------------------------|-----------------------------------------------------------------------------------------------------------------------------------------------------------------------------------------------------------------------------------------------------------------------------------------------------------------------------------------------------------------------------------------------------------------------------------------------|--------------------------------------------------|-------------------------------------------------------------------------|---------------------------------------------------------------------------------------------------------------------------------------------------------------------------------------------------------------------------------------------------------------------------------------------------------------------------------------------------------------------------------------------------------------------------------------------------------------------------------------------------------------------------------------------------------------------------------------------------------------------------------------------------------------------------------------------------------------------------------------------------|
| Chambers et al., 2015; 2019 [27, 28] | <ul style="list-style-type: none"> <li>• Utilisation of erectile dysfunction treatments</li> <li>• Sexual function and satisfaction</li> <li>• Sexual supportive care needs</li> <li>• Sexual self-confidence</li> <li>• Masculine self-esteem</li> <li>• Marital satisfaction</li> <li>• Program evaluation</li> </ul> | <p>IG1 - participants received telephone calls from nurse consultants and sessions followed principals of cognitive behavioural sex and couples therapy.</p> <p>IG2 received peer support telephone intervention for others living with prostate cancer based on the sharing of common personal experiences. CG – usual care.</p>                                                                                                             | Telephone, Audio-visual DVD                      | 6 weeks (post-surgery recruitment) or 8 weeks (pre-surgery recruitment) | <p>No significant effects of intervention on the primary outcomes of sexual function, sexuality needs, sexual self-confidence, masculine self-esteem, marital satisfaction or intimacy were found for either men or women. For helpfulness of telephone calls, the mean rating for the nurse intervention at the 6-month assessment was 8.33 for females; the mean rating for the peer intervention was 7.47 for females. IG2 had improved sexual function and satisfaction at 2 years (p=0.002) and at 3 years (p=0.003) compared to usual care. Compared to IG1, IG2 had improved sexual function and satisfaction at 2 years (p=0.023) and at 3 years (p=0.035). IG1 had higher marital satisfaction compared to IG2 (p=0.006) at 4 years.</p> |
| Chien et al., 2020 [40]              | <ul style="list-style-type: none"> <li>• Disease appraisals</li> <li>• Emotion status</li> <li>• Relationship satisfaction</li> <li>• Health-related quality of life</li> <li>• Satisfaction with intervention</li> </ul>                                                                                               | <p>IG1: The intervention included a psychosocial information package (PIP<sup>®</sup>) manual and telephone support for 6 weeks. Six-session psychosocial information manuals were provided. A trained nurse called the participants to guide their reading and to explain the manual content.</p> <p>IG2: The intervention included a weekly multimedia psychosocial intervention (MPI<sup>®</sup>) via the mobile messaging application</p> | Online Telephone<br>Hardcopy<br>Multimedia films | 6 week course                                                           | <p>At T1<sup>c</sup> the PIP had high positive affect than control group (p=0.027). At T2<sup>d</sup> the MPI and PIP groups experienced significant improvements in negative affect compared with the control group (p=0.044). The PIP group had higher QOL<sup>s</sup> at T2 than control group (p=0.023).</p>                                                                                                                                                                                                                                                                                                                                                                                                                                  |

|                          |                                                                         |                                                                                                                                                                                                                                                                                                                                                                                                                                                                                                                                                                                                                                                                                                                                                                                                            |              |               |                                                                                                                                                                                                                                                                                                                                                                        |
|--------------------------|-------------------------------------------------------------------------|------------------------------------------------------------------------------------------------------------------------------------------------------------------------------------------------------------------------------------------------------------------------------------------------------------------------------------------------------------------------------------------------------------------------------------------------------------------------------------------------------------------------------------------------------------------------------------------------------------------------------------------------------------------------------------------------------------------------------------------------------------------------------------------------------------|--------------|---------------|------------------------------------------------------------------------------------------------------------------------------------------------------------------------------------------------------------------------------------------------------------------------------------------------------------------------------------------------------------------------|
|                          |                                                                         | <p>(MMA<sup>1</sup>), a psychosocial information manual and professional support for 6 weeks. The researchers confirmed that the MMA was installed on the smartphone of the participants in the MPI group. The participants could talk with the trained nurse separately, through the MMA or telephone, any concerns related to PCa. An experienced nurse in urology provided professional support. The trained nurse was to understand and clarify the participants' questions and difficulties in learning and using information and to listen to their problems and feelings separately. With regard to their problems and feelings, the trained nurse offered available information and encouraged them to use previously learned coping skills or referred them to the urologist or case manager.</p> |              |               |                                                                                                                                                                                                                                                                                                                                                                        |
| Couper et al., 2015 [33] | <ul style="list-style-type: none"> <li>Relationship function</li> </ul> | <p>Cognitive existential couples therapy (CECT<sup>2</sup>). Six sessions delivered once a week for 60-90 minutes each week focusing of supportive, existential and cognitive therapy. Sessions were adapted to address identified needs of each couple.</p>                                                                                                                                                                                                                                                                                                                                                                                                                                                                                                                                               | Face-to-face | 6 week course | <p>Younger carers had significantly lower distress (p=0.008), avoidance (p=0.04) intrusive thoughts (p=0.006) and hyper arousal (p=0.01) at T1. Significance was maintained to T2 for distress (p=0.04), avoidance (p=0.05) and intrusive thoughts (p=0.02). Partner who completed the CECT program showed significant improvements in cohesion (p=0.007) conflict</p> |



|                            |                                                                                                                                                   |                                                                                                                                                                                                                                                                                          |                     |                |                                                                                                                                                                                                                                                                                                                                 |
|----------------------------|---------------------------------------------------------------------------------------------------------------------------------------------------|------------------------------------------------------------------------------------------------------------------------------------------------------------------------------------------------------------------------------------------------------------------------------------------|---------------------|----------------|---------------------------------------------------------------------------------------------------------------------------------------------------------------------------------------------------------------------------------------------------------------------------------------------------------------------------------|
|                            |                                                                                                                                                   |                                                                                                                                                                                                                                                                                          |                     |                | resolution (p=0.01) and relational function (p=0.009)                                                                                                                                                                                                                                                                           |
| Karlsen et al., 2021 [41]  | <ul style="list-style-type: none"> <li>• Sexual functioning</li> <li>• Sexual distress</li> </ul>                                                 | ProCan - six counselling sessions and three pelvic floor muscle training sessions with a home video training program.                                                                                                                                                                    | Face-to-face, video | 24 weeks       | No significant change in sexual function or sexual distress at T2 or T3 months, or between IG and CG. A significant improvement in carers physical function was seen between IG and CG (p=0.012)                                                                                                                                |
| Lyons et al., 2016 [34]    | <ul style="list-style-type: none"> <li>• Physical intimacy</li> <li>• Relationship quality</li> </ul>                                             | "Exercising together" Exercise sessions led by a physiologist. Twice weekly sessions for 1 hours, lasting for 6 months. Each partner in the dyad acted as the other persons coach and would monitor and assist one another to perform exercises.                                         | Face-to-face        | 26 week course | Wives had significant increase in engagement in affectionate behaviours over time p<0.001                                                                                                                                                                                                                                       |
| Malcarne et al., 2018 [39] | <ul style="list-style-type: none"> <li>• Distress</li> </ul>                                                                                      | Problem solving therapy - sessions were delivered in the dyads home and focused on problems identified by spouses. Therapy involved developing and choosing coping strategies and evaluating strategies. Partners were asked to complete homework sheets related to identified problems. | Face-to-face        | 6-8 sessions   | IG showed significant improvements in distress at post-intervention (p=0.044) and 6 months (p=0.032). Dyadic adjustment was significantly improved at post intervention (p=0.049) but not 6 months. Constructive problem solving significantly improved from baseline to post intervention (p=0.014) and to 6 months (p=0.044). |
| Manne et al., 2004 [35]    | <ul style="list-style-type: none"> <li>• General distress, cancer specific distress</li> <li>• Coping</li> <li>• Post traumatic growth</li> </ul> | Six one hour group sessions to learn about cancer care. Topics included: medical information, nutrition, stress management and coping training, communication and meeting needs, maintaining intimacy and survivorship issues. Homework activities                                       | Face-to-face        | 6 week course  | No significant impact on distress. Women in the intervention group had significant improvements in subsections of coping including denial and subsections of post traumatic growth including relating to others, spiritual growth, personal growth and                                                                          |

|                             |                                                                                                                                                                                                                        |                                                                                                                                                                                                                                                                                                                                                                                                                                                                                         |                           |                                                              |                                                                                                                                                                                                                                |
|-----------------------------|------------------------------------------------------------------------------------------------------------------------------------------------------------------------------------------------------------------------|-----------------------------------------------------------------------------------------------------------------------------------------------------------------------------------------------------------------------------------------------------------------------------------------------------------------------------------------------------------------------------------------------------------------------------------------------------------------------------------------|---------------------------|--------------------------------------------------------------|--------------------------------------------------------------------------------------------------------------------------------------------------------------------------------------------------------------------------------|
|                             | <ul style="list-style-type: none"> <li>• Cancer specific marital interactions (communication)</li> </ul>                                                                                                               | included relaxation activities, talking about feelings and asking for support.                                                                                                                                                                                                                                                                                                                                                                                                          |                           |                                                              | appreciation for life (all p=0.00)                                                                                                                                                                                             |
| Manne et al. 2019 [43]      | <ul style="list-style-type: none"> <li>• General psychological adjustment</li> <li>• Depression</li> <li>• Cancer-specific distress</li> <li>• Cancer-related concerns</li> <li>• Relationship satisfaction</li> </ul> | Intimacy-enhancing therapy (IET <sup>k</sup> ) & General health and wellness intervention (GHW <sup>l</sup> ). Both consisted of five 90-min couples' sessions and one 30–45 min booster call. IET focused on improving a couples' ability to share their thoughts and feelings regarding cancer, promoting mutual understanding and support, facilitating constructive discussions regarding cancer concerns, and enhancing emotional intimacy. GHW focused on a healthy lifestyle     | Face-to-face<br>Telephone | 5x 90 minute couple sessions and one phone call (30-45 mins) | Among spouses in longer relationships, psychological adjustment increased in both IET (p < .001) and GHW (p =0.09). Psychological adjustment was significant in IET (p<0.001) compared to GHW, but not compared to usual care. |
| McCaughan et al., 2018 [44] | <ul style="list-style-type: none"> <li>• Self-efficacy</li> <li>• Quality of life</li> <li>• Symptom distress</li> <li>• Communication</li> <li>• Uncertainty and illness benefit</li> <li>• Social support</li> </ul> | CONNECT: Based upon the FOCUS <sup>m</sup> program. 5 intervention sessions are delivered to prostate cancer patients and their partners over a 9 week period of time. The sessions consist of 3 2-hour small group sessions (on weeks 1, 3 and 9) and 2 telephone sessions (weeks 5 and 7) with men and their partners. The aim was to enhance the couple's belief in their ability to manage their cancer and related issues. The sessions consisted mainly of discussions on symptom | Face-to-face<br>Telephone | 9 week program (three group, two telephone sessions)         | No statistical results due to low control numbers, only means for comparison.                                                                                                                                                  |

|                             |                                                                                                                                                                                                                                                                                                                                                                  |                                                                                                                                                                                                      |                           |               |                                                                                                                                                                                                                                                                                                                                                                                                                                                                                                                                                                                                                                                                                                                                                                                                                                                                                                                                                                                                                                    |
|-----------------------------|------------------------------------------------------------------------------------------------------------------------------------------------------------------------------------------------------------------------------------------------------------------------------------------------------------------------------------------------------------------|------------------------------------------------------------------------------------------------------------------------------------------------------------------------------------------------------|---------------------------|---------------|------------------------------------------------------------------------------------------------------------------------------------------------------------------------------------------------------------------------------------------------------------------------------------------------------------------------------------------------------------------------------------------------------------------------------------------------------------------------------------------------------------------------------------------------------------------------------------------------------------------------------------------------------------------------------------------------------------------------------------------------------------------------------------------------------------------------------------------------------------------------------------------------------------------------------------------------------------------------------------------------------------------------------------|
|                             |                                                                                                                                                                                                                                                                                                                                                                  | management, sexual and urinary dysfunction, uncertainty management, positive thinking and healthy lifestyles                                                                                         |                           |               |                                                                                                                                                                                                                                                                                                                                                                                                                                                                                                                                                                                                                                                                                                                                                                                                                                                                                                                                                                                                                                    |
| Northouse et al., 2007 [45] | <ul style="list-style-type: none"> <li>• Quality of life</li> <li>• Appraisal variables: Appraisals of illness/caregiving</li> <li>• Uncertainty</li> <li>• Hopelessness</li> <li>• Coping resource</li> <li>• Coping strategies</li> <li>• Self-efficacy</li> <li>• Communication about the illness</li> <li>• Symptoms</li> <li>• Risk for distress</li> </ul> | FOCUS: family based intervention focused on support and education. Has five core areas: Family involvement, Optimistic attitude, Coping effectiveness, Uncertainty reduction, and Symptom management | Face-to-face<br>Telephone | 8 week course | Spouses reported better physical QOL than controls at 8 months ( $p < .05$ ) and at 12 months ( $p < .01$ ), intervention spouses had better mental QOL scores ( $p < .05$ ) and overall QOL scores ( $p < .01$ ). Intervention spouses had significantly less negative appraisal of caregiving ( $p < .01$ ), significantly less uncertainty about the illness ( $p < .01$ ), and less hopelessness ( $p < .05$ ) than control spouses at 4 months higher self-efficacy about ways to manage the illness than control spouses at 4 months ( $p < .05$ ) and 12 months ( $p < .05$ ), better communication with patients than control spouses at 4 months ( $p < .01$ ), 8 months ( $p < .05$ ), and 12 months ( $p < .01$ ), used more active coping at 12 months than control spouses ( $p < .05$ ), significantly less general symptom distress of their own than control spouses ( $p < .01$ ) and had fewer problems related to their husbands' urinary incontinence at 4 months ( $p < .05$ ) and at 8 months ( $p < .01$ ). |

|                                 |                                                                                                                                                                                                                                                                                                                                                       |                                                                                                                                                                 |                       |                                                                                |                                                                                                                                                                                                                                                                                                                                                                                                                                                                                                           |
|---------------------------------|-------------------------------------------------------------------------------------------------------------------------------------------------------------------------------------------------------------------------------------------------------------------------------------------------------------------------------------------------------|-----------------------------------------------------------------------------------------------------------------------------------------------------------------|-----------------------|--------------------------------------------------------------------------------|-----------------------------------------------------------------------------------------------------------------------------------------------------------------------------------------------------------------------------------------------------------------------------------------------------------------------------------------------------------------------------------------------------------------------------------------------------------------------------------------------------------|
| Walker et al., 2013 [46]        | <ul style="list-style-type: none"> <li>• Intimacy in relationships</li> <li>• Dyadic Adjustment</li> </ul>                                                                                                                                                                                                                                            | Information Booklet: Androgen Deprivation Therapy: A Guide for Prostate Cancer Patients and Their Partners                                                      | Face-to-face Hardcopy | 2 weeks provide to read booklet plus a subsequent 1hr education review session | Intimacy in relationships: e effect size for partners' change scores was observed at 0.04, treatment group scoring lower ( $M^v=-9.21$ , $SD^u=24.80$ ) than the control group ( $M=-8.38$ , $SD=19.60$ ), dyadic adjustment: medium effect size was observed at 0.50, with the treatment group scoring better ( $M=-9.12$ , $SD=22.10$ ) than the control group ( $M=-21.40$ , $SD=26.90$ ), sexual activity: baseline= 42.9% active in the last month, 6 month follow up= 30% active in the last month. |
| Winters-Stone et al., 2016 [37] | <ul style="list-style-type: none"> <li>• Self-reported demographics</li> <li>• Health status</li> <li>• Body composition</li> <li>• Maximal muscle strength</li> <li>• Physical function</li> <li>• Self-reported physical &amp; mental health</li> <li>• Self-reported moderate-vigorous intensity physical activity</li> <li>• Adherence</li> </ul> | The Exercising Together Project - strength training program focused on the physical and mental health of prostate cancer survivors and their spouse caregivers. | Face-to-face          | 26 week course                                                                 | Spouses in Exercising Together had slight gains in lean mass compared to no change in controls ( $p = 0.05$ ), significantly improved their upper ( $p < 0.01$ ) and lower body ( $p < 0.01$ ) strength, chair stand time ( $p=0.02$ ), and physical performance battery scores ( $p=0.01$ ).                                                                                                                                                                                                             |
| Wittman et al., 2022 [51]       | <ul style="list-style-type: none"> <li>• Satisfaction with sex life</li> <li>• Sexual</li> </ul>                                                                                                                                                                                                                                                      | A tailored web-based platform for sexual intimacy delivered over 6 modules.                                                                                     | Online                | 6 modules, 28 weeks                                                            | No significant impact in sexual function between intervention and control group. Partners in                                                                                                                                                                                                                                                                                                                                                                                                              |

|                           |                                                                                                                                                      |                                                                                                                                                                                                                                                                                                                              |                                                   |                |                                                                                                                                                                                                                 |
|---------------------------|------------------------------------------------------------------------------------------------------------------------------------------------------|------------------------------------------------------------------------------------------------------------------------------------------------------------------------------------------------------------------------------------------------------------------------------------------------------------------------------|---------------------------------------------------|----------------|-----------------------------------------------------------------------------------------------------------------------------------------------------------------------------------------------------------------|
|                           | function                                                                                                                                             |                                                                                                                                                                                                                                                                                                                              |                                                   |                | the IG reported more sexual activity (p=0.037) between baseline and 3 months.                                                                                                                                   |
| Canada et al., 2005 [32]  | <ul style="list-style-type: none"> <li>Female sexual function index</li> <li>Distress</li> <li>Quality of life</li> <li>Dyadic adjustment</li> </ul> | Four sessions (approx. 60 mins each) with a counsellor focusing on sexual communication using CBT techniques specific to each partner. Participants were asked to complete homework. In the comparison group, men attended sessions alone.                                                                                   | Face-to-face                                      | 4 week course  | Females sexual functioning scores significantly improved overtime from baseline to 6 month follow up (p<0.05). No impact on marital adjustment or distress.                                                     |
| Carlson et al., 2017 [52] | <ul style="list-style-type: none"> <li>Mood disturbance</li> </ul>                                                                                   | Six weekly 1.5hr group Supportive Expressive Therapy (SET <sup>®</sup> ) sessions focused on coping with distress through emotional expression, discussing uncertainty in a supportive environment, fostering communication, and finding meaning. Sessions were facilitated by two experienced doctoral-level psychologists. | Group sessions (specific modality not identified) | 6 week course  | Regardless of group membership, partners reported improvements in total mood disturbance (p=.011), tension (p<.001), anger (p=.041), confusion (p<.001), state anxiety (p<.001), and emotional support (p=.037) |
| Hampton et al., 2013 [30] | <ul style="list-style-type: none"> <li>Sexual functioning</li> <li>Feasibility</li> <li>Acceptability</li> </ul>                                     | One 3.5 hour workshop on sexuality including changes in functionality, understanding values and expectations, maintaining intimacy, committing as a couple to the sexual relationship                                                                                                                                        | Face-to-face                                      | Single session | Partners had significant improvements in medical impact scores (p=0.008) sexual interest (p=0.008), problems (p<0.01) and total sexual function (p=0.011) after the workshop                                    |
| Karlsen et al., 2017 [42] | <ul style="list-style-type: none"> <li>Erectile functioning (males)</li> </ul>                                                                       | ProCan- so one-hour couples counselling sessions, one group and three individual PFMT <sup>o</sup> sessions, DVD <sup>p</sup> of PFMT for home training plus standard care including preoperative information.                                                                                                               | Face-to-face<br>DVD                               | 6 week course  | On average female seal function increased from 15 to 21 from baseline to 12 month follow up.                                                                                                                    |

|                             |                                                                                                                                                                                                                         |                                                                                                                                                                                                                                                                                                                                                                                     |                           |                                                              |                                                                                                                                                                                                                                                                                        |
|-----------------------------|-------------------------------------------------------------------------------------------------------------------------------------------------------------------------------------------------------------------------|-------------------------------------------------------------------------------------------------------------------------------------------------------------------------------------------------------------------------------------------------------------------------------------------------------------------------------------------------------------------------------------|---------------------------|--------------------------------------------------------------|----------------------------------------------------------------------------------------------------------------------------------------------------------------------------------------------------------------------------------------------------------------------------------------|
| Levesque et al., 2015 [47]  | <ul style="list-style-type: none"> <li>• Biopsychosocial concerns</li> <li>• Perceptions of information received.</li> </ul>                                                                                            | Coping Together - 4 booklets providing information on symptom management, communication with healthcare professionals, support for partners and dealing with emotions. A relation CD <sup>a</sup> , DVD and newsletter were provided as additional supplements.                                                                                                                     | Hardcopy CD<br>Newsletter | Resource provided post randomisation and accessed as needed. | Top unmet needs were in relation to worries, concerns and emotions. Partners reported receiving less information on self-management and support services than patients and were overall less satisfied with the intervention (P<0.007)                                                 |
| Manne et al., 2011 [36]     | <ul style="list-style-type: none"> <li>• Distress,</li> <li>• Wellbeing</li> <li>• Cancer-Specific Distress</li> <li>• Cancer Concerns</li> <li>• Relationship satisfaction</li> <li>• Relationship intimacy</li> </ul> | IET: intervention consisting of five 90 minute couples' sessions. Focus is on improving couples' ability to comfortably share their thoughts and feelings regarding cancer, promote mutual understanding and support regarding their own and one another's cancer experience, facilitate constructive discussion of cancer concerns, and to enhance and maintain emotional intimacy | Face-to-face              | 8 weeks (5x90 minute sessions)                               | No significant treatment differences. Moderator effect was found for baseline cancer specific distress (p=0.005), second moderator effect was found for baseline relationship satisfaction (p<0.0001), third moderator effect was found for baseline relationship intimacy (p<0.0001)) |
| Robertson et al., 2016 [38] | <ul style="list-style-type: none"> <li>• Sexual bother subdomain of the Expanded Prostate Cancer Index Composite</li> </ul>                                                                                             | Relational Psychosexual Treatment for Couples With Prostate Cancer: psychosexual intervention comprised of assistance with emotional disclosure, psychoeducation, relational and sexual needs, and dyadic adjustment and coping                                                                                                                                                     | Face-to-face              | 6 X 50 minute sessions - time frame varied per couple        | Statistically significant effect on sexual bother immediately following the intervention (p=.04)(patient only). Small decreases in anxiety and depression for the intervention couples - not statistically significant                                                                 |
| Song et al., 2021 [50]      | <ul style="list-style-type: none"> <li>• Quality of Life</li> </ul>                                                                                                                                                     | Prostate Cancer Education and Resources for Couples (PERC <sup>c</sup> ) - web-based mHealth program accessible via any device. Includes modules on working effectively as a team,                                                                                                                                                                                                  | Online                    | Accessed as needed                                           | No significant results for carers outcomes.                                                                                                                                                                                                                                            |

|                                                                                                                                                                                                                                                                                                                                                                                                                                                                                                                                                                                                                                                                                                                                                                                                                                                                                                                                                                                                                                                              |  |                                                                                                                                                                                                                                                        |  |  |  |
|--------------------------------------------------------------------------------------------------------------------------------------------------------------------------------------------------------------------------------------------------------------------------------------------------------------------------------------------------------------------------------------------------------------------------------------------------------------------------------------------------------------------------------------------------------------------------------------------------------------------------------------------------------------------------------------------------------------------------------------------------------------------------------------------------------------------------------------------------------------------------------------------------------------------------------------------------------------------------------------------------------------------------------------------------------------|--|--------------------------------------------------------------------------------------------------------------------------------------------------------------------------------------------------------------------------------------------------------|--|--|--|
|                                                                                                                                                                                                                                                                                                                                                                                                                                                                                                                                                                                                                                                                                                                                                                                                                                                                                                                                                                                                                                                              |  | <p>assessing and managing prostate cancer treatment-related side effects and symptoms (including urinary and bowel problems, sexual dysfunction, hormonal symptoms, pain, fatigue, sleep disturbance, and stress), and improve healthy behaviours.</p> |  |  |  |
| <p><sup>a</sup>IG1= Intervention group one, <sup>b</sup>IG2=intervention group 2, <sup>c</sup>T1= follow up time one, <sup>d</sup>T2 = follow up time 2, <sup>e</sup>TIP-C= Telephone interpersonal counselling, <sup>f</sup>HEAC= health education attention condition, <sup>g</sup>PIP=psychosocial information package, <sup>h</sup>MPI=multimedia psychosocial intervention, <sup>i</sup>MMA= mobile messaging application, <sup>j</sup>CECT= Cognitive existential couples therapy, <sup>k</sup>IET=Intimacy enhancing therapy, <sup>l</sup>GHW= General health and wellness, <sup>m</sup>FOCUS= Family involvement, optimistic attitude, coping effectiveness, uncertainty reduction, and symptom management, <sup>n</sup>SET= supportive expressive therapy, <sup>o</sup>PFMT=pelvic floor muscle training, <sup>p</sup>DVD=digital video disc, <sup>q</sup>CD= computerised disc, <sup>r</sup>PERC=prostate cancer education and resources for couples, <sup>s</sup>QOL=quality of life, <sup>u</sup>SD= standard deviation, <sup>v</sup>M=mean.</p> |  |                                                                                                                                                                                                                                                        |  |  |  |

| Supplementary Table 3. The types of unmet needs addressed in each study, tailoring of content to carers and impact on outcomes |                       |                                                                    |         |         |        |               |           |          |       |                                 |                    |                       |          |                    |
|--------------------------------------------------------------------------------------------------------------------------------|-----------------------|--------------------------------------------------------------------|---------|---------|--------|---------------|-----------|----------|-------|---------------------------------|--------------------|-----------------------|----------|--------------------|
| Authors                                                                                                                        | Intervention modality | Types of unmet needs that may have been addressed in interventions |         |         |        |               |           |          |       | Number of supportive care needs | Tailored to carers | Intervention delivery |          | Impact on outcomes |
|                                                                                                                                |                       | Information                                                        | Support | Marital | Sexual | Psychological | Practical | Physical | Other |                                 |                    | Only to carers        | To dyads |                    |
| <b>Randomised Controlled Trials</b>                                                                                            |                       |                                                                    |         |         |        |               |           |          |       |                                 |                    |                       |          |                    |
| Borji et al., 2017 [31]                                                                                                        | Face-to-face          |                                                                    |         |         |        | ü             |           |          |       | 1                               | Y <sup>a</sup>     | ü                     |          | S <sup>d</sup>     |
| Couper et al., 2015 [33]                                                                                                       | Face-to-face          |                                                                    |         | ü       |        |               |           |          |       | 1                               | Y                  |                       | ü        | S                  |
| Lyons et al., 2016 [34]                                                                                                        | Face-to-face          |                                                                    |         |         | ü      |               |           |          |       | 1                               | N <sup>b</sup>     |                       | ü        | S                  |
| Manne et al. 2004 [35]                                                                                                         | Face-to-face          |                                                                    |         |         |        | ü             |           |          |       | 1                               | U <sup>c</sup>     | ü                     |          | S                  |
| Winters-Stone et al., 2016 [37]                                                                                                | Face-to-face          |                                                                    |         |         |        | ü             |           | ü        |       | 2                               | Y                  |                       | ü        | S                  |
| Wittman et al., 2022 [51]                                                                                                      | Online                |                                                                    |         |         | ü      |               |           |          |       | 1                               | Y                  |                       | ü        | S                  |
| Badger et al., 2011 [48]                                                                                                       | Telephone             |                                                                    |         |         |        | ü             |           |          |       | 1                               | Y                  |                       | ü        | S                  |
| Campbell et al., 2007 [49]                                                                                                     | Telephone             | ü                                                                  |         |         |        | ü             |           |          |       | 2                               | Y                  |                       | ü        | E <sup>f</sup>     |
| Chambers et al., 2015; 2019 [27, 28]                                                                                           | Combination           |                                                                    |         | ü       | ü      |               |           |          | ü     | 2                               | N                  |                       | ü        | S                  |
| Chien et al., 2020 [40]                                                                                                        | Combination           | ü                                                                  |         |         | ü      | ü             |           |          | ü     | 4                               | Y                  |                       | ü        | S                  |
| Karlsen et al., 2021                                                                                                           | Combination           |                                                                    |         |         | ü      |               |           |          |       | 1                               | Y                  |                       | ü        | S                  |



|                             |              |   |   |   |   |   |   |  |   |   |   |   |   |                 |
|-----------------------------|--------------|---|---|---|---|---|---|--|---|---|---|---|---|-----------------|
| [41]                        |              |   |   |   |   |   |   |  |   |   |   |   |   |                 |
| Malcarne et al., 2018 [39]  | Combination  |   |   |   |   | ü |   |  |   | 1 | Y | ü |   | S               |
| Manne et al. 2019 [43]      | Combination  |   |   | ü |   | ü |   |  | ü | 2 | Y |   | ü | S               |
| McCaughan et al., 2018 [44] | Combination  | ü | ü |   |   | ü |   |  | ü | 3 | Y |   | ü | NS <sup>e</sup> |
| Northouse et al., 2007 [45] | Combination  | ü | ü |   |   | ü |   |  | ü | 3 | Y |   | ü | S               |
| Walker et al., 2013 [46]    | Combination  | ü |   | ü | ü |   |   |  |   | 3 | U |   | ü | E               |
| <b>Pilot studies</b>        |              |   |   |   |   |   |   |  |   |   |   |   |   |                 |
| Canada et al., 2005 [32]    | Face-to-face |   |   |   |   | ü |   |  |   | 1 | Y |   | ü | S               |
| Hampton et al., 2013 [30]   | Face-to-face |   |   |   |   | ü |   |  |   | 1 | Y |   | ü | S               |
| Robertson et al., 2016 [38] | Face-to-face |   |   |   |   | ü | ü |  |   | 2 | Y |   | ü | NS              |
| Manne et al., 2011 [36]     | Face-to-face |   |   | ü |   | ü |   |  | ü | 3 | Y |   | ü | M <sup>g</sup>  |
| Song et al., 2021 [50]      | Online       |   |   |   |   | ü |   |  |   | 1 | Y |   | ü | NS              |
| Karlsen et al., 2017 [42]   | Combination  |   |   |   |   | ü |   |  |   | 1 | Y |   | ü | NS              |
| Levesque et al., 2015 [47]  | Combination  | ü |   |   |   |   |   |  |   | 1 | N |   | ü | NS              |
| Carlson et al., 2017 [52]   | NS           |   |   |   |   | ü |   |  |   | 1 | Y |   | ü | NS              |

<sup>a</sup>Y= yes, <sup>b</sup>N=no, <sup>c</sup>U=unsure, <sup>d</sup>S=significant impact on carers' outcomes, <sup>e</sup>NS= no significant impact on carers' outcomes, <sup>f</sup>E=effect sizes indicate positive change in carers' outcomes, <sup>g</sup>M=moderator effect in carers' outcomes.
